# Supplementary material for: Mapping short reads, faithfully
Source: bioRxiv or medRxiv preprint supplement (doi:10.1101/2020.02.10.942599), 2020-02-11
Supplement: Supplementary file [file media-1.pdf]

# Mapping short reads, faithfully: supplementary figures

Eduard Valera Zorita, Ruggero Cortini, Guillaume J. Filion

February 10, 2020

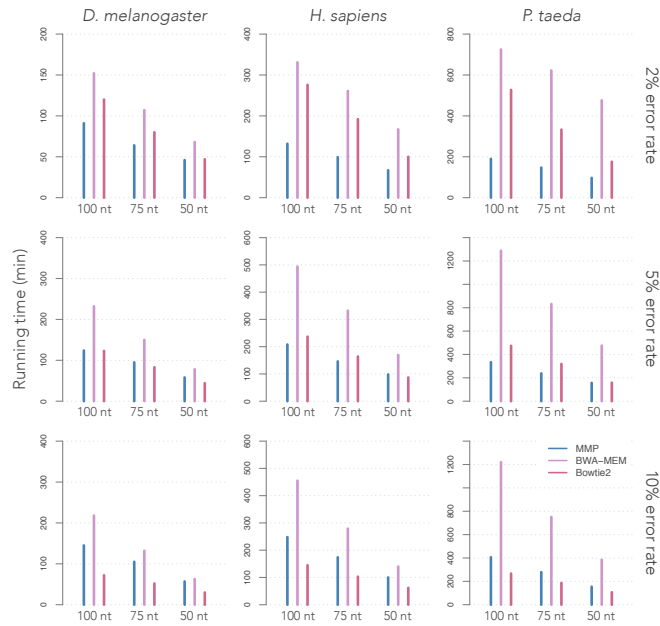

Supplementary Figure 1: Resource usage at 2, 5 and 10% error rate. The representations are as in Figure 8 (the memory footprint does not depend on the error rate of the sequencing process).

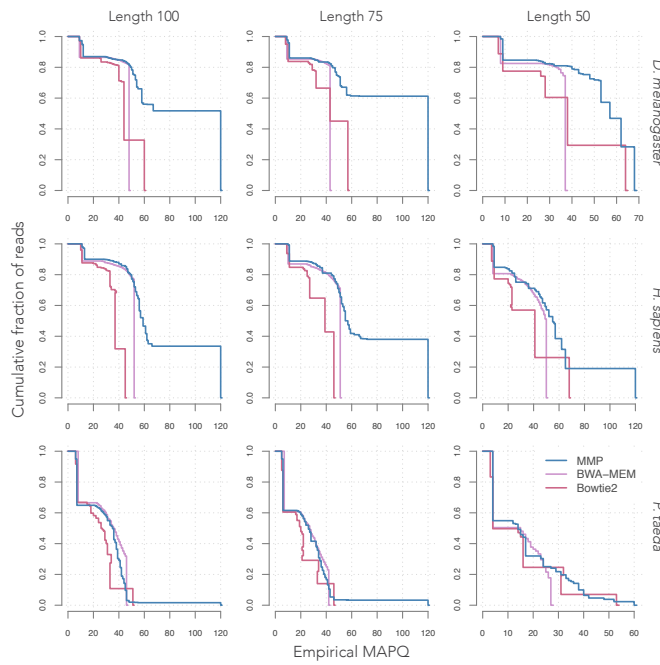

Supplementary Figure 2: Mapping accuracy with 2% error rate. The representations are as in Figure 7.

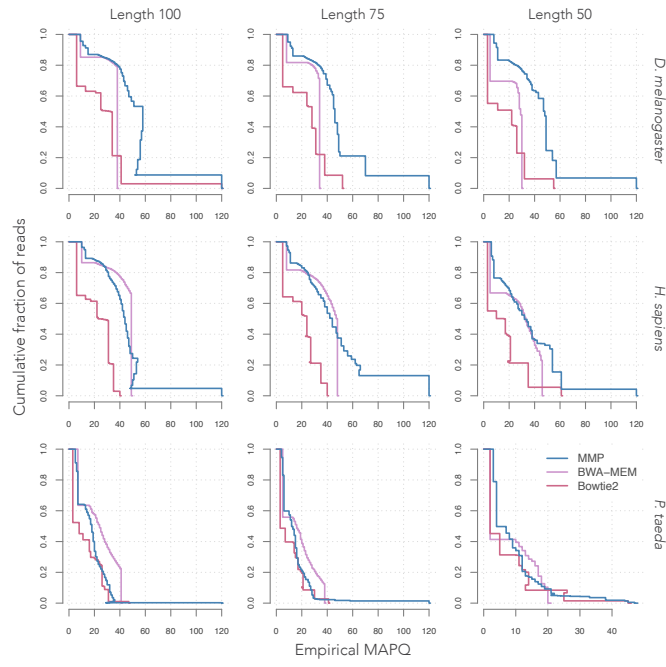

Supplementary Figure 3: Mapping accuracy with 5% error rate. The representations are as in Figure 7.

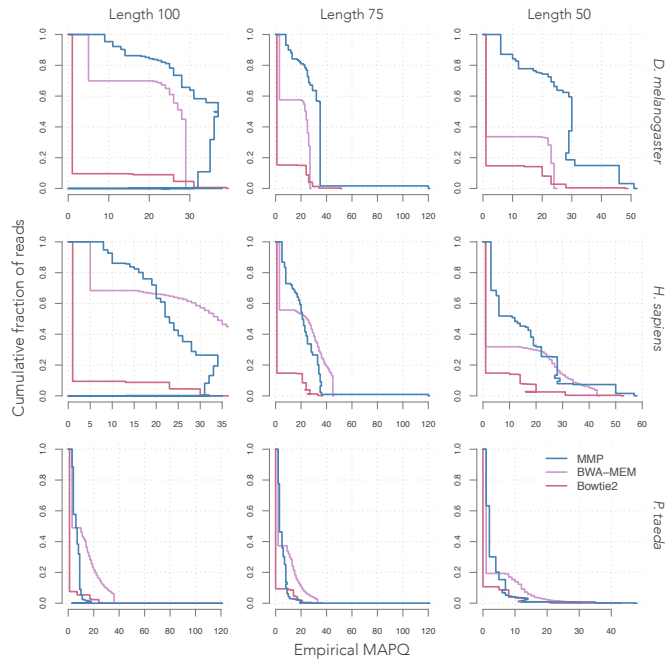

Supplementary Figure 4: Mapping accuracy with 10% error rate. The representations are as in Figure 7.

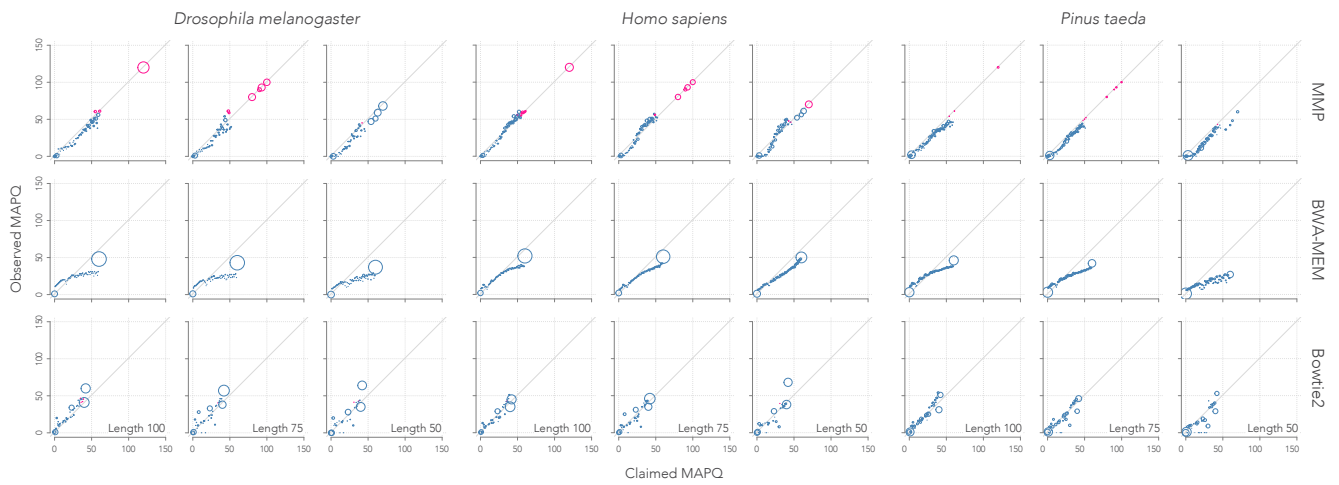

Supplementary Figure 5: Faithfulness with 2% error rate. The representations are the same as in Figure 6.

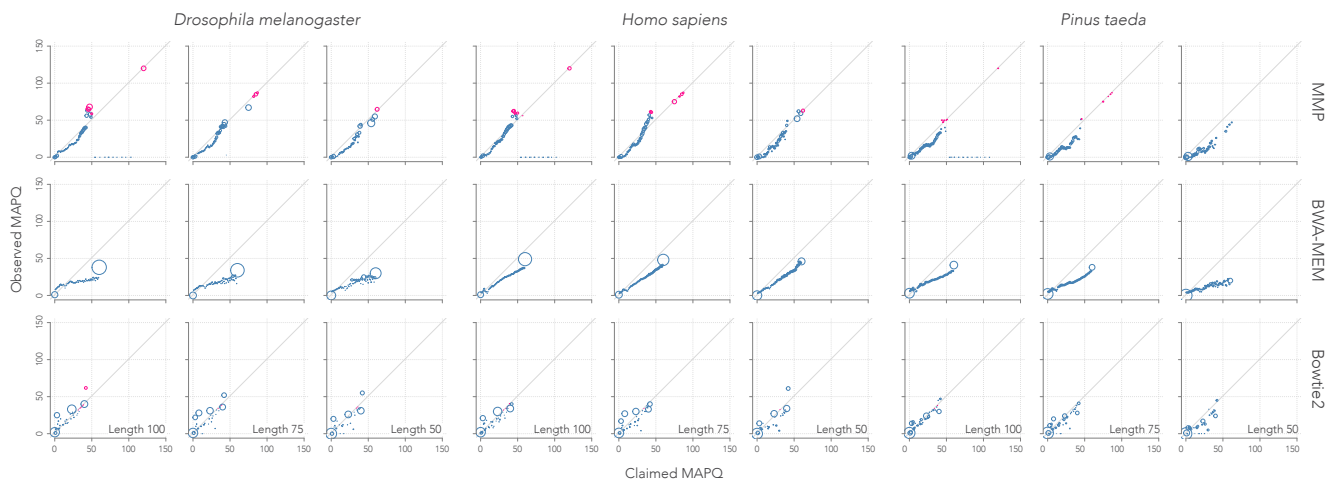

Supplementary Figure 6: Faithfulness with 5% error rate. The representations are the same as in Figure 6.

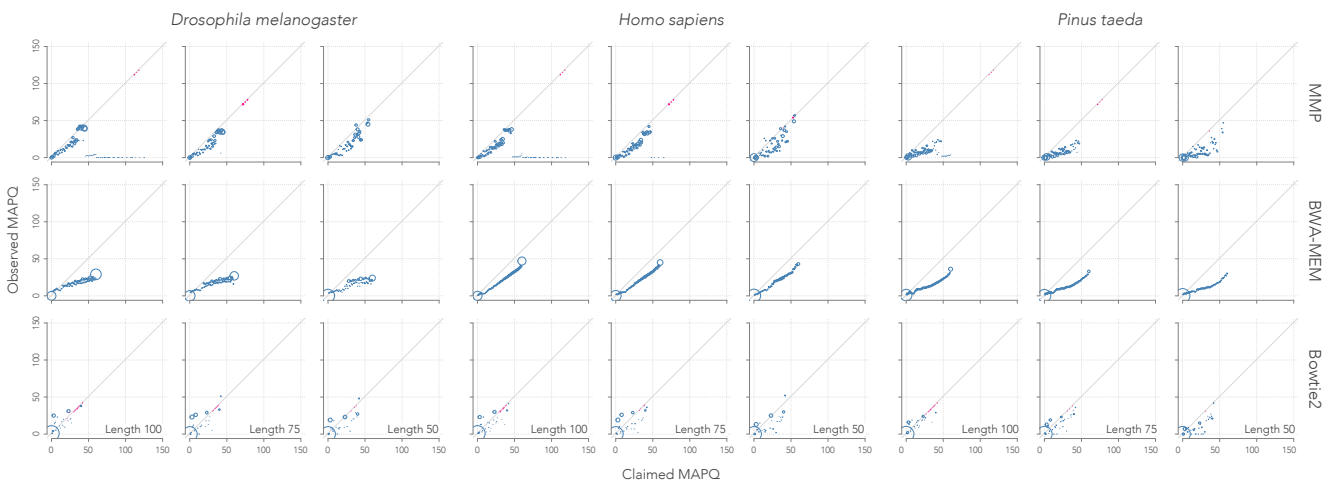

Supplementary Figure 7: Faithfulness with 10% error rate. The representations are the same as in Figure 6.
